# Supplementary material
Source: MDPI journal article supplement (https://www.mdpi.com/2071-1050/16/1/244)
Supplement: s1 [file s1]

# Supplementary Materials: Integrated Agent-Based Simulation and Game Theory Decision Support Framework for Cash Flow and Payment Management in Construction Projects

Dalia H. Dorrah and Brenda McCabe

**Table S1.** Scheduling and cost details of building B4 of the CBP case study project.

| No. | WBS Code             | Work Item Description                                        | Sub-contractor | Dur (days) | Direct Costs (\$) | Indirect Costs (\$) | Predecessors                                           |
|-----|----------------------|--------------------------------------------------------------|----------------|------------|-------------------|---------------------|--------------------------------------------------------|
| 1   | CBP.SW.MOB.1         | Mobilization                                                 | Mobilization   | 17         | 2400000.00        | 240000.00           | -                                                      |
| 2   | CBP.B4.SUB.R.1.1     | Erection of formwork for PC raft                             | Foundation     | 1          | 4264.00           | 426.40              | CBP.SW.MOB.1                                           |
| 3   | CBP.B4.SUB.R.1.2     | Pouring concrete for PC raft                                 | Foundation     | 1          | 49360.00          | 4936.00             | CBP.B4.SUB.R.1.1                                       |
| 4   | CBP.B4.SUB.R.1.3     | Dismantling of formwork for PC raft                          | Foundation     | 1          | 176.00            | 17.60               | CBP.B4.SUB.R.1.2                                       |
| 5   | CBP.B4.SUB.R.1.4     | Insulation of PC raft                                        | Foundation     | 2          | 492192.00         | 49219.20            | CBP.B4.SUB.R.1.3                                       |
| 6   | CBP.B4.SUB.R.2.1.1   | Erection of formwork for RC raft                             | Foundation     | 1          | 38552.00          | 3855.20             | CBP.B4.SUB.R.1.2                                       |
| 7   | CBP.B4.SUB.R.2.1.2   | Installation of reinforcement for RC raft                    | Foundation     | 11         | 381040.00         | 38104.00            | CBP.B4.SUB.R.2.1.1                                     |
| 8   | CBP.B4.SUB.R.2.1.3   | Pouring concrete for RC raft                                 | Foundation     | 1          | 443840.00         | 44384.00            | CBP.B4.SUB.R.2.1.2                                     |
| 9   | CBP.B4.SUB.R.2.1.4   | Dismantling of formwork for RC raft                          | Foundation     | 2          | 352.00            | 35.20               | CBP.B4.SUB.R.2.1.3                                     |
| 10  | CBP.B4.SUB.R.2.1.5   | Insulation of RC raft                                        | Foundation     | 1          | 71964.00          | 7196.40             | CBP.B4.SUB.R.2.1.4, CBP.B4.SUB.R.1.4                   |
| 11  | CBP.B4.SUB.R.2.2.1   | Erection of formwork for RC pedestals                        | Foundation     | 1          | 18000.00          | 1800.00             | CBP.B4.SUB.R.2.1.3                                     |
| 12  | CBP.B4.SUB.R.2.2.2   | Installation of reinforcement for pedestals                  | Foundation     | 2          | 36168.00          | 3616.80             | CBP.B4.SUB.R.2.2.1                                     |
| 13  | CBP.B4.SUB.R.2.2.3   | Pouring concrete for RC pedestals                            | Foundation     | 1          | 22864.00          | 2286.40             | CBP.B4.SUB.R.2.2.2                                     |
| 14  | CBP.B4.SUB.R.2.2.4   | Dismantling of formwork for RC pedestals                     | Foundation     | 1          | 176.00            | 17.60               | CBP.B4.SUB.R.2.2.3                                     |
| 15  | CBP.B4.SUB.R.2.2.5   | Insulation of RC pedestals                                   | Foundation     | 1          | 86544.00          | 8654.40             | CBP.B4.SUB.R.2.2.4, CBP.B4.SUB.R.2.1.5                 |
| 16  | CBP.B4.SUB.1.1.1.1   | Erection of columns formwork for 1st level basement          | Concrete       | 2          | 93120.00          | 9312.00             | CBP.B4.SUB.R.2.2.3                                     |
| 17  | CBP.B4.SUB.1.1.1.2   | Installation of columns reinforcement for 1st level basement | Concrete       | 2          | 43788.80          | 4378.88             | CBP.B4.SUB.1.1.1.1                                     |
| 18  | CBP.B4.SUB.1.1.1.3   | Pouring concrete columns for 1st level basement              | Concrete       | 1          | 30640.00          | 3064.00             | CBP.B4.SUB.1.1.1.2                                     |
| 19  | CBP.B4.SUB.1.1.1.4   | Dismantling of columns formwork for 1st level basement       | Concrete       | 1          | 1760.00           | 176.00              | CBP.B4.SUB.1.1.1.3                                     |
| 20  | CBP.B4.SUB.1.1.2.1   | Erection of slab and beams formwork for 1st level basement   | Concrete       | 8          | 456480.00         | 45648.00            | CBP.B4.SUB.1.1.1.3                                     |
| 21  | CBP.B4.SUB.1.1.2.2   | Installation of slab reinforcement for 1st level basement    | Concrete       | 9          | 268637.69         | 26863.77            | CBP.B4.SUB.1.1.2.1                                     |
| 22  | CBP.B4.SUB.1.1.2.3   | Pouring concrete slab for 1st level basement                 | Concrete       | 1          | 182160.00         | 18216.00            | CBP.B4.SUB.1.1.2.2                                     |
| 23  | CBP.B4.SUB.1.1.2.4   | Dismantling of slab formwork for 1st level basement          | Concrete       | 3          | 1760.00           | 176.00              | CBP.B4.SUB.1.1.2.3, CBP.B4.SUB.1.1.1.4                 |
| 24  | CBP.B4.SUB.1.2.1.1   | Installation of concrete blocks for 1st level basement       | Masonry        | 6          | 13278.40          | 1327.84             | CBP.B4.SUB.1.1.2.4                                     |
| 25  | CBP.B4.SUB.1.2.2.2.1 | Plastering ceiling of 1st level basement                     | Int Finishes   | 2          | 3865.60           | 386.56              | CBP.B4.SUB.1.2.1.1, CBP.B4.SUB.1.2.4, CBP.B4.SUB.1.3.1 |
| 26  | CBP.B4.SUB.1.2.2.2.2 | Painting ceiling of 1st level basement                       | Int Finishes   | 1          | 3608.00           | 360.80              | CBP.B4.SUB.1.2.2.2.1, CBP.B4.SUB.1.3.2                 |
| 27  | CBP.B4.SUB.1.2.2.4.1 | Installation of handrail for 1st level basement              | Int Finishes   | 1          | 4160.00           | 416.00              | CBP.B4.SUB.1.2.2.4.2, CBP.B4.SUB.1.2.2.3.2             |
| 28  | CBP.B4.SUB.1.2.2.4.2 | Granite flooring for stairs 1st level basement               | Int Finishes   | 1          | 58710.00          | 5871.00             | CBP.B4.SUB.1.2.2.3.2, CBP.B4.SUB.1.2.2.3.3             |
| 29  | CBP.B4.SUB.1.2.2.3.1 | Epoxy painting of 1st level basement                         | Int Finishes   | 1          | 78696.00          | 7869.60             | CBP.B4.SUB.1.2.2.4.1                                   |
| 30  | CBP.B4.SUB.1.2.2.3.2 | Marble installation for lift lobby of 1st level basement     | Int Finishes   | 1          | 15840.00          | 1584.00             | CBP.B4.SUB.1.2.2.1.4                                   |
| 31  | CBP.B4.SUB.1.2.2.3.3 | Ceramic installation for baths of 1st level basement         | Int Finishes   | 1          | 2720.00           | 272.00              | CBP.B4.SUB.1.2.2.3.2                                   |
| 32  | CBP.B4.SUB.1.2.2.1.1 | Plastering walls of 1st level basement                       | Int Finishes   | 2          | 4422.40           | 442.24              | CBP.B4.SUB.1.2.2.2.2                                   |
| 33  | CBP.B4.SUB.1.2.2.1.2 | Painting walls of 1st level basement                         | Int Finishes   | 1          | 3564.00           | 356.40              | CBP.B4.SUB.1.2.2.1.1                                   |

Table S1: Scheduling and cost details of building B4 of the CBP case study project (cont.)

| No. | WBS Code               | Work Item Description                                                  | Sub-contractor | Dur (days) | Direct Costs (\$) | Indirect Costs (\$) | Predecessors                                                                                    |
|-----|------------------------|------------------------------------------------------------------------|----------------|------------|-------------------|---------------------|-------------------------------------------------------------------------------------------------|
| 34  | CBP.B4.SUB.1.2.2.1.3   | Ceramic cladding of baths for 1st level basement                       | Int Finishes   | 2          | 10560.00          | 1056.00             | CBP.B4.SUB.1.2.2.1.2                                                                            |
| 35  | CBP.B4.SUB.1.2.2.1.4   | Marble cladding of lift lobby for 1st level basement                   | Int Finishes   | 1          | 31520.00          | 3152.00             | CBP.B4.SUB.1.2.2.1.2,<br>CBP.B4.SUB.1.2.2.1.3                                                   |
| 36  | CBP.B4.SUB.2.1.2.1     | Erection of slab and beams formwork for 2nd level basement             | Concrete       | 8          | 456480.00         | 45648.00            | CBP.B4.SUB.2.1.1.3                                                                              |
| 37  | CBP.B4.SUB.2.1.2.2     | Installation of slab reinforcement for 2nd level basement              | Concrete       | 9          | 268637.60         | 26863.76            | CBP.B4.SUB.2.1.2.1                                                                              |
| 38  | CBP.B4.SUB.2.1.2.3     | Pouring concrete slab for 2nd level basement                           | Concrete       | 1          | 182160.00         | 18216.00            | CBP.B4.SUB.2.1.2.2                                                                              |
| 39  | CBP.B4.SUB.2.1.2.4     | Dismantling of slab formwork for 2nd level basement                    | Concrete       | 3          | 1760.00           | 176.00              | CBP.B4.SUB.2.1.2.3,<br>CBP.B4.SUB.2.1.1.4                                                       |
| 40  | CBP.B4.SUB.2.1.1.1     | Erection of columns formwork for 2nd level basement                    | Concrete       | 2          | 93120.00          | 9312.00             | CBP.B4.SUB.1.1.2.3                                                                              |
| 41  | CBP.B4.SUB.2.1.1.2     | Installation of columns reinforcement for 2nd level basement           | Concrete       | 2          | 43788.80          | 4378.88             | CBP.B4.SUB.2.1.1.1                                                                              |
| 42  | CBP.B4.SUB.2.1.1.3     | Pouring concrete columns for 2nd level basement                        | Concrete       | 1          | 30640.00          | 3064.00             | CBP.B4.SUB.2.1.1.2                                                                              |
| 43  | CBP.B4.SUB.2.1.1.4     | Dismantling of columns formwork for 2nd level basement                 | Concrete       | 1          | 1760.00           | 176.00              | CBP.B4.SUB.2.1.1.3                                                                              |
| 44  | CBP.B4.SUB.2.2.1.1     | Installation of concrete blocks for 2nd level basement                 | Masonry        | 6          | 13278.40          | 1327.84             | CBP.B4.SUB.2.1.2.4,<br>CBP.B4.SUB.1.2.1.1                                                       |
| 45  | CBP.B4.SUB.2.2.2.1.1   | Plastering walls of 2nd level basement                                 | Int Finishes   | 2          | 4422.40           | 442.24              | CBP.B4.SUB.2.2.2.2                                                                              |
| 46  | CBP.B4.SUB.2.2.2.1.2   | Painting walls of 2nd level basement                                   | Int Finishes   | 1          | 3564.00           | 356.40              | CBP.B4.SUB.2.2.2.1.1,<br>CBP.B4.SUB.2.3.2                                                       |
| 47  | CBP.B4.SUB.2.2.2.1.3   | Ceramic cladding of baths for 2nd level basement                       | Int Finishes   | 2          | 10560.00          | 1056.00             | CBP.B4.SUB.2.2.2.1.2                                                                            |
| 48  | CBP.B4.SUB.2.2.2.1.4   | Marble cladding of lift lobby for 2nd level basement                   | Int Finishes   | 1          | 31520.00          | 3152.00             | CBP.B4.SUB.2.2.2.1.2,<br>CBP.B4.SUB.2.2.2.1.3                                                   |
| 49  | CBP.B4.SUB.2.2.2.2.1   | Plastering ceiling of 2nd level basement                               | Int Finishes   | 2          | 3865.60           | 386.56              | CBP.B4.SUB.2.2.1.1,<br>CBP.B4.SUB.1.2.2.1.1,<br>CBP.B4.SUB.2.3.1                                |
| 50  | CBP.B4.SUB.2.2.2.2.2   | Painting ceiling of 2nd level basement                                 | Int Finishes   | 1          | 20240.00          | 2024.00             | CBP.B4.SUB.2.2.2.2.1,<br>CBP.B4.SUB.1.2.2.1.2                                                   |
| 51  | CBP.B4.SUB.2.2.2.3.1   | Epoxy painting of 2nd level basement                                   | Int Finishes   | 1          | 78696.00          | 7869.60             | CBP.B4.SUB.2.2.2.4.1,<br>CBP.B4.SUB.1.2.2.3.1                                                   |
| 52  | CBP.B4.SUB.2.2.2.3.2   | Marble installation for lift lobby of 2nd level basement               | Int Finishes   | 1          | 15840.00          | 1584.00             | CBP.B4.SUB.2.2.2.1.4                                                                            |
| 53  | CBP.B4.SUB.2.2.2.3.3   | Ceramic installation for baths of 2nd level basement                   | Int Finishes   | 1          | 2720.00           | 272.00              | CBP.B4.SUB.2.2.2.3.2                                                                            |
| 54  | CBP.B4.SUB.2.2.2.4.1   | Installation of handrail for 2nd level basement                        | Int Finishes   | 1          | 4160.00           | 416.00              | CBP.B4.SUB.2.2.2.4.2,<br>CBP.B4.SUB.1.2.2.4.1,<br>CBP.B4.SUB.2.2.2.3.2,<br>CBP.B4.SUB.2.2.2.3.3 |
| 55  | CBP.B4.SUB.2.2.2.4.2   | Granite flooring for stairs 2nd level basement                         | Int Finishes   | 1          | 58710.00          | 5871.00             | CBP.B4.SUB.2.2.2.3.2                                                                            |
| 56  | CBP.B4.SUP.LGF.1.1.1   | Erection of columns formwork for lower ground floor                    | Concrete       | 2          | 75480.00          | 7548.00             | CBP.B4.SUB.2.1.2.3                                                                              |
| 57  | CBP.B4.SUP.LGF.1.1.2   | Installation of columns reinforcement for lower ground floor           | Concrete       | 1          | 32340.00          | 3234.00             | CBP.B4.SUP.LGF.1.1.1                                                                            |
| 58  | CBP.B4.SUP.LGF.1.1.3   | Pouring concrete for lower ground floor                                | Concrete       | 1          | 26800.00          | 2680.00             | CBP.B4.SUP.LGF.1.1.2                                                                            |
| 59  | CBP.B4.SUP.LGF.1.1.4   | Dismantling of formwork for lower ground floor                         | Concrete       | 1          | 176.00            | 17.60               | CBP.B4.SUP.LGF.1.1.3                                                                            |
| 60  | CBP.B4.SUP.LGF.1.2.1   | Erection of slabs and beams formwork for lower ground floor            | Concrete       | 5          | 282920.00         | 28292.00            | CBP.B4.SUP.LGF.1.1.3                                                                            |
| 61  | CBP.B4.SUP.LGF.1.2.2   | Installation of reinforcement for lower ground floor                   | Concrete       | 5          | 160116.00         | 16011.60            | CBP.B4.SUP.LGF.1.2.1                                                                            |
| 62  | CBP.B4.SUP.LGF.1.2.3   | Pouring concrete for lower ground floor                                | Concrete       | 1          | 129840.00         | 12984.00            | CBP.B4.SUP.LGF.1.2.2                                                                            |
| 63  | CBP.B4.SUP.LGF.1.2.4   | Dismantling of formwork for lower ground floor                         | Concrete       | 2          | 352.00            | 35.20               | CBP.B4.SUP.LGF.1.2.3,<br>CBP.B4.SUP.LGF.1.1.4                                                   |
| 64  | CBP.B4.SUP.LGF.2.1.1   | Installation of concrete blocks for lower ground floor                 | Masonry        | 5          | 11678.40          | 1167.84             | CBP.B4.SUP.LGF.1.2.4,<br>CBP.B4.SUB.2.2.1.1                                                     |
| 65  | CBP.B4.SUP.LGF.2.2.3.1 | Marble installation for lift lobby and corridors of lower ground floor | Int Finishes   | 2          | 19680.00          | 1968.00             | CBP.B4.SUP.LGF.2.2.1.4                                                                          |

Table S1: Scheduling and cost details of building B4 of the CBP case study project (cont.)

| No. | WBS Code               | Work Item Description                                      | Sub-contractor | Dur (days) | Direct Costs (\$) | Indirect Costs (\$) | Predecessors                                                                                          |
|-----|------------------------|------------------------------------------------------------|----------------|------------|-------------------|---------------------|-------------------------------------------------------------------------------------------------------|
| 66  | CBP.B4.SUP.LGF.2.2.3.2 | Ceramic installation for baths of lower ground floor       | Int Finishes   | 1          | 2720.00           | 272.00              | CBP.B4.SUP.LGF.2.2.3.1                                                                                |
| 67  | CBP.B4.SUP.LGF.2.2.1.1 | Plastering walls of lower ground floor                     | Int Finishes   | 2          | 5382.40           | 538.24              | CBP.B4.SUP.LGF.2.2.2.3                                                                                |
| 68  | CBP.B4.SUP.LGF.2.2.1.2 | Painting walls of lower ground floor                       | Int Finishes   | 2          | 10200.00          | 1020.00             | CBP.B4.SUP.LGF.2.2.1.1,<br>CBP.B4.SUB.2.2.2.1.2                                                       |
| 69  | CBP.B4.SUP.LGF.2.2.1.3 | Ceramic cladding of baths for lower ground floor           | Int Finishes   | 2          | 10560.00          | 1056.00             | CBP.B4.SUP.LGF.2.2.1.2                                                                                |
| 70  | CBP.B4.SUP.LGF.2.2.1.4 | Marble cladding of lift lobby for lower ground floor       | Int Finishes   | 2          | 51680.00          | 5168.00             | CBP.B4.SUP.LGF.2.2.1.3,<br>CBP.B4.SUP.LGF.2.2.1.2                                                     |
| 71  | CBP.B4.SUP.LGF.2.2.4.1 | Installation of handrail of lower ground floor             | Int Finishes   | 1          | 4068.57           | 406.86              | CBP.B4.SUP.LGF.2.2.4.2,<br>CBP.B4.SUB.2.2.2.4.1,<br>CBP.B4.SUP.LGF.2.2.3.1,<br>CBP.B4.SUP.LGF.2.2.3.2 |
| 72  | CBP.B4.SUP.LGF.2.2.4.2 | Granite flooring for stairs lower ground floor             | Int Finishes   | 1          | 45270.00          | 4527.00             | CBP.B4.SUP.LGF.2.2.3.1                                                                                |
| 73  | CBP.B4.SUP.LGF.2.2.2.1 | Plastering ceiling of lower ground floor                   | Int Finishes   | 2          | 4121.60           | 412.16              | CBP.B4.SUP.LGF.2.1.1,<br>CBP.B4.SUB.2.2.2.1.1,<br>CBP.B4.SUP.LGF.3.1                                  |
| 74  | CBP.B4.SUP.LGF.2.2.2.2 | Gypsum suspended ceiling 1st fix for lower ground floor    | Int Finishes   | 1          | 416.00            | 41.60               | CBP.B4.SUP.LGF.2.2.2.1,<br>CBP.B4.SUP.LGF.3.2                                                         |
| 75  | CBP.B4.SUP.FF.2.1.1    | Installation of concrete blocks 1st floor                  | Masonry        | 5          | 11678.40          | 1167.84             | CBP.B4.SUP.FF.1.2.4,<br>CBP.B4.SUP.GF.2.1.1                                                           |
| 76  | CBP.B4.SUP.FF.2.2.2.1  | Plastering ceiling of 1st floor                            | Int Finishes   | 2          | 4121.60           | 412.16              | CBP.B4.SUP.FF.2.1.1,<br>CBP.B4.SUP.GF.2.2.1.1,<br>CBP.B4.SUP.FF.3.1                                   |
| 77  | CBP.B4.SUP.FF.2.2.2.2  | Gypsum suspended ceiling 1st fix for 1st floor             | Int Finishes   | 1          | 6552.00           | 655.20              | CBP.B4.SUP.FF.2.2.2.1,<br>CBP.B4.SUP.GF.2.2.2.3,<br>CBP.B4.SUP.FF.3.2                                 |
| 78  | CBP.B4.SUP.FF.2.2.3.1  | Marble installation for lift lobby and corridors 1st floor | Int Finishes   | 2          | 19680.00          | 1968.00             | CBP.B4.SUP.FF.2.2.1.4                                                                                 |
| 79  | CBP.B4.SUP.FF.2.2.3.2  | Ceramic intallation for baths 1st floor                    | Int Finishes   | 1          | 2720.00           | 272.00              | CBP.B4.SUP.FF.2.2.3.1                                                                                 |
| 80  | CBP.B4.SUP.FF.2.2.1.1  | Plastering walls of 1st floor                              | Int Finishes   | 2          | 5382.40           | 538.24              | CBP.B4.SUP.FF.2.2.2.3                                                                                 |
| 81  | CBP.B4.SUP.FF.2.2.1.2  | Painting walls of 1st floor                                | Int Finishes   | 2          | 10200.00          | 1020.00             | CBP.B4.SUP.FF.2.2.1.1,<br>CBP.B4.SUP.GF.2.2.1.2                                                       |
| 82  | CBP.B4.SUP.FF.2.2.1.3  | Ceramic cladding of baths for 1st floor                    | Int Finishes   | 2          | 10560.00          | 1056.00             | CBP.B4.SUP.FF.2.2.1.2                                                                                 |
| 83  | CBP.B4.SUP.FF.2.2.1.4  | Marble cladding of lift lobby for 1st floor                | Int Finishes   | 2          | 51680.00          | 5168.00             | CBP.B4.SUP.FF.2.2.1.2,<br>CBP.B4.SUP.FF.2.2.1.3                                                       |
| 84  | CBP.B4.SUP.FF.2.2.4.1  | Installation of handrail for 1st floor                     | Int Finishes   | 1          | 4160.00           | 416.00              | CBP.B4.SUP.FF.2.2.4.2,<br>CBP.B4.SUP.GF.2.2.4.1,<br>CBP.B4.SUP.FF.2.2.3.1,<br>CBP.B4.SUP.FF.2.2.3.2   |
| 85  | CBP.B4.SUP.FF.2.2.4.2  | Granite flooring for stairs 1st floor                      | Int Finishes   | 1          | 45270.00          | 4527.00             | CBP.B4.SUP.FF.2.2.3.1                                                                                 |
| 86  | CBP.B4.SUP.FF.1.1.1    | Erection of columns formwork for 1st floor                 | Concrete       | 2          | 75480.00          | 7548.00             | CBP.B4.SUP.GF.1.2.3                                                                                   |
| 87  | CBP.B4.SUP.FF.1.1.2    | Installation of columns reinforcement 1st floor            | Concrete       | 1          | 32340.00          | 3234.00             | CBP.B4.SUP.FF.1.1.1                                                                                   |
| 88  | CBP.B4.SUP.FF.1.1.3    | Pouring concrete for 1st floor                             | Concrete       | 1          | 26800.00          | 2680.00             | CBP.B4.SUP.FF.1.1.2                                                                                   |
| 89  | CBP.B4.SUP.FF.1.1.4    | Dismantling of formwork for 1st floor                      | Concrete       | 1          | 176.00            | 17.60               | CBP.B4.SUP.FF.1.1.3                                                                                   |
| 90  | CBP.B4.SUP.FF.1.2.1    | Erection of slabs and beams formwork for 1st floor         | Concrete       | 5          | 282920.00         | 28292.00            | CBP.B4.SUP.FF.1.1.3                                                                                   |
| 91  | CBP.B4.SUP.FF.1.2.2    | Installation of reinforcement 1st floor                    | Concrete       | 5          | 160116.00         | 16011.60            | CBP.B4.SUP.FF.1.2.1                                                                                   |
| 92  | CBP.B4.SUP.FF.1.2.3    | Pouring concrete for 1st floor                             | Concrete       | 1          | 129840.00         | 12984.00            | CBP.B4.SUP.FF.1.2.2                                                                                   |
| 93  | CBP.B4.SUP.FF.1.2.4    | Dismantling of formwork for 1st floor                      | Concrete       | 2          | 352.00            | 35.20               | CBP.B4.SUP.FF.1.1.4,<br>CBP.B4.SUP.FF.1.2.3                                                           |
| 94  | CBP.B4.SUP.SXF.1.2.1   | Erection of slabs and beams formwork for 6th floor         | Concrete       | 5          | 282920.00         | 28292.00            | CBP.B4.SUP.SXF.1.1.3                                                                                  |
| 95  | CBP.B4.SUP.SXF.1.2.2   | Installation of reinforcement 6th floor                    | Concrete       | 5          | 160116.00         | 16011.60            | CBP.B4.SUP.SXF.1.2.1                                                                                  |
| 96  | CBP.B4.SUP.SXF.1.2.3   | Pouring concrete for 6th floor                             | Concrete       | 1          | 129840.00         | 12984.00            | CBP.B4.SUP.SXF.1.2.2                                                                                  |
| 97  | CBP.B4.SUP.SXF.1.2.4   | Dismantling of formwork for 6th floor                      | Concrete       | 2          | 352.00            | 35.20               | CBP.B4.SUP.SXF.1.2.3,<br>CBP.B4.SUP.SXF.1.1.4                                                         |
| 98  | CBP.B4.SUP.SXF.1.1.1   | Erection of columns formwork for 6th floor                 | Concrete       | 2          | 75480.00          | 7548.00             | CBP.B4.SUP.FVF.1.2.3                                                                                  |
| 99  | CBP.B4.SUP.SXF.1.1.2   | Installation of columns reinforcement 6th floor            | Concrete       | 1          | 32340.00          | 3234.00             | CBP.B4.SUP.SXF.1.1.1                                                                                  |
| 100 | CBP.B4.SUP.SXF.1.1.3   | Pouring concrete for 6th floor                             | Concrete       | 1          | 26800.00          | 2680.00             | CBP.B4.SUP.SXF.1.1.2                                                                                  |

Table S1: Scheduling and cost details of building B4 of the CBP case study project (cont.)

| No. | WBS Code               | Work Item Description                                         | Sub-contractor | Dur (days) | Direct Costs (\$) | Indirect Costs (\$) | Predecessors                                                                                            |
|-----|------------------------|---------------------------------------------------------------|----------------|------------|-------------------|---------------------|---------------------------------------------------------------------------------------------------------|
| 101 | CBP.B4.SUP.SXF.1.1.4   | Dismantling of formwork for 6th floor                         | Concrete       | 1          | 176.00            | 17.60               | CBP.B4.SUP.SXF.1.1.3                                                                                    |
| 102 | CBP.B4.SUP.SXF.2.1.1   | Installation of concrete blocks 6th floor                     | Masonry        | 5          | 11678.40          | 1167.84             | CBP.B4.SUP.SXF.1.2.4,<br>CBP.B4.SUP.FVF.2.1.1                                                           |
| 103 | CBP.B4.SUP.SXF.2.2.1.1 | Plastering walls of 6th floor                                 | Int Finishes   | 2          | 5382.40           | 538.24              | CBP.B4.SUP.SXF.2.2.2.3                                                                                  |
| 104 | CBP.B4.SUP.SXF.2.2.1.2 | Painting walls of 6th floor                                   | Int Finishes   | 2          | 10200.00          | 1020.00             | CBP.B4.SUP.SXF.2.2.1.1,<br>CBP.B4.SUP.FVF.2.2.1.2                                                       |
| 105 | CBP.B4.SUP.SXF.2.2.1.3 | Ceramic cladding of baths for 6th floor                       | Int Finishes   | 2          | 10560.00          | 1056.00             | CBP.B4.SUP.SXF.2.2.1.2                                                                                  |
| 106 | CBP.B4.SUP.SXF.2.2.1.4 | Marble cladding of lift lobby for 6th floor                   | Int Finishes   | 2          | 51680.00          | 5168.00             | CBP.B4.SUP.SXF.2.2.1.2,<br>CBP.B4.SUP.SXF.2.2.1.3                                                       |
| 107 | CBP.B4.SUP.SXF.2.2.4.1 | Installation of handrail for 6th floor                        | Int Finishes   | 1          | 4160.00           | 416.00              | CBP.B4.SUP.SXF.2.2.4.2,<br>CBP.B4.SUP.FVF.2.2.4.1,<br>CBP.B4.SUP.SXF.2.2.3.1,<br>CBP.B4.SUP.SXF.2.2.3.2 |
| 108 | CBP.B4.SUP.SXF.2.2.4.2 | Granite flooring for stairs 6th floor                         | Int Finishes   | 1          | 45270.00          | 4527.00             | CBP.B4.SUP.SXF.2.2.3.1                                                                                  |
| 109 | CBP.B4.SUP.SXF.2.2.2.1 | Plastering ceiling of 6th floor                               | Int Finishes   | 2          | 4121.60           | 412.16              | CBP.B4.SUP.SXF.2.1.1,<br>CBP.B4.SUP.FVF.2.2.1.1,<br>CBP.B4.SUP.SXF.3.1                                  |
| 110 | CBP.B4.SUP.SXF.2.2.2.2 | Gypsum suspended ceiling 1st fix for 6th floor                | Int Finishes   | 1          | 6552.00           | 655.20              | CBP.B4.SUP.SXF.2.2.2.1,<br>CBP.B4.SUP.FVF.2.2.2.3,<br>CBP.B4.SUP.SXF.3.3                                |
| 111 | CBP.B4.SUP.SXF.2.2.2.3 | Gypsum suspended ceiling 2nd fix for 6th floor                | Int Finishes   | 1          | 0.00              | 0.00                | CBP.B4.SUP.SXF.2.2.2.2                                                                                  |
| 112 | CBP.B4.SUP.SXF.2.2.3.1 | Marble installation for lift lobby and corridors 6th floor    | Int Finishes   | 2          | 15840.00          | 1584.00             | CBP.B4.SUP.SXF.2.2.1.4                                                                                  |
| 113 | CBP.B4.SUP.SXF.2.2.3.2 | Ceramic installation for baths 6th floor                      | Int Finishes   | 1          | 2720.00           | 272.00              | CBP.B4.SUP.SXF.2.2.3.1                                                                                  |
| 114 | CBP.B4.SUP.GF.1.2.1    | Erection of slabs and beams formwork for ground floor         | Concrete       | 5          | 282920.00         | 28292.00            | CBP.B4.SUP.GF.1.1.3                                                                                     |
| 115 | CBP.B4.SUP.GF.1.2.2    | Installation of reinforcement ground floor                    | Concrete       | 5          | 160116.00         | 16011.60            | CBP.B4.SUP.GF.1.2.1                                                                                     |
| 116 | CBP.B4.SUP.GF.1.2.3    | Pouring concrete for ground floor                             | Concrete       | 1          | 129840.00         | 12984.00            | CBP.B4.SUP.GF.1.2.2                                                                                     |
| 117 | CBP.B4.SUP.GF.1.2.4    | Dismantling of formwork for ground floor                      | Concrete       | 2          | 352.00            | 35.20               | CBP.B4.SUP.GF.1.2.3,<br>CBP.B4.SUP.GF.1.1.4                                                             |
| 118 | CBP.B4.SUP.GF.1.1.1    | Erection of columns formwork for ground floor                 | Concrete       | 2          | 75480.00          | 7548.00             | CBP.B4.SUP.LGF.1.2.3                                                                                    |
| 119 | CBP.B4.SUP.GF.1.1.2    | Installation of columns reinforcement ground floor            | Concrete       | 1          | 32340.00          | 3234.00             | CBP.B4.SUP.GF.1.1.1                                                                                     |
| 120 | CBP.B4.SUP.GF.1.1.3    | Pouring concrete for ground floor                             | Concrete       | 1          | 26800.00          | 2680.00             | CBP.B4.SUP.GF.1.1.2                                                                                     |
| 121 | CBP.B4.SUP.GF.1.1.4    | Dismantling of formwork for ground floor                      | Concrete       | 1          | 176.00            | 17.60               | CBP.B4.SUP.GF.1.1.3                                                                                     |
| 122 | CBP.B4.SUP.GF.2.1.1    | Installation of concrete blocks ground floor                  | Masonry        | 5          | 11678.40          | 1167.84             | CBP.B4.SUP.GF.1.2.4,<br>CBP.B4.SUP.LGF.2.1.1                                                            |
| 123 | CBP.B4.SUP.GF.2.2.1.1  | Plastering walls of ground floor                              | Int Finishes   | 2          | 5382.40           | 538.24              | CBP.B4.SUP.GF.2.2.2.3                                                                                   |
| 124 | CBP.B4.SUP.GF.2.2.1.2  | Painting walls of ground floor                                | Int Finishes   | 2          | 10200.00          | 1020.00             | CBP.B4.SUP.GF.2.2.1.1,<br>CBP.B4.SUP.LGF.2.2.1.2                                                        |
| 125 | CBP.B4.SUP.GF.2.2.1.3  | Ceramic cladding of baths for ground floor                    | Int Finishes   | 2          | 10560.00          | 1056.00             | CBP.B4.SUP.GF.2.2.1.2                                                                                   |
| 126 | CBP.B4.SUP.GF.2.2.1.4  | Marble cladding of lift lobby for ground floor                | Int Finishes   | 2          | 51680.00          | 5168.00             | CBP.B4.SUP.GF.2.2.1.3,<br>CBP.B4.SUP.GF.2.2.1.2                                                         |
| 127 | CBP.B4.SUP.GF.2.2.4.1  | Installation of handrail for ground floor                     | Int Finishes   | 1          | 4160.00           | 416.00              | CBP.B4.SUP.GF.2.2.4.2,<br>CBP.B4.SUP.LGF.2.2.4.1,<br>CBP.B4.SUP.GF.2.2.3.1,<br>CBP.B4.SUP.GF.2.2.3.2    |
| 128 | CBP.B4.SUP.GF.2.2.4.2  | Granite flooring for stairs ground floor                      | Int Finishes   | 1          | 45270.00          | 4527.00             | CBP.B4.SUP.GF.2.2.3.1                                                                                   |
| 129 | CBP.B4.SUP.GF.2.2.2.1  | Plastering ceiling of ground floor                            | Int Finishes   | 2          | 4121.60           | 412.16              | CBP.B4.SUP.GF.2.1.1,<br>CBP.B4.SUP.LGF.2.2.1.1,<br>CBP.B4.SUP.GF.3.1                                    |
| 130 | CBP.B4.SUP.GF.2.2.2.2  | Gypsum suspended ceiling 1st fix for ground floor             | Int Finishes   | 1          | 416.00            | 41.60               | CBP.B4.SUP.GF.2.2.2.1,<br>CBP.B4.SUP.LGF.2.2.2.3,<br>CBP.B4.SUP.GF.3.2                                  |
| 131 | CBP.B4.SUP.GF.2.2.3.2  | Ceramic intallation for baths ground floor                    | Int Finishes   | 1          | 2720.00           | 272.00              | CBP.B4.SUP.GF.2.2.3.1                                                                                   |
| 132 | CBP.B4.SUP.GF.2.2.3.1  | Marble installation for lift lobby and corridors ground floor | Int Finishes   | 2          | 19680.00          | 1968.00             | CBP.B4.SUP.GF.2.2.1.4                                                                                   |
| 133 | CBP.B4.SUP.SF.1.2.1    | Erection of slabs and beams formwork for 2nd floor            | Concrete       | 5          | 282920.00         | 28292.00            | CBP.B4.SUP.SF.1.1.3                                                                                     |

Table S1: Scheduling and cost details of building B4 of the CBP case study project (cont.)

| No. | WBS Code              | Work Item Description                                      | Sub-contractor | Dur (days) | Direct Costs (\$) | Indirect Costs (\$) | Predecessors                                                                               |
|-----|-----------------------|------------------------------------------------------------|----------------|------------|-------------------|---------------------|--------------------------------------------------------------------------------------------|
| 134 | CBP.B4.SUP.SF.1.2.2   | Installation of reinforcement 2nd floor                    | Concrete       | 5          | 160116.00         | 16011.60            | CBP.B4.SUP.SF.1.2.1                                                                        |
| 135 | CBP.B4.SUP.SF.1.2.3   | Pouring concrete for 2nd floor                             | Concrete       | 1          | 129840.00         | 12984.00            | CBP.B4.SUP.SF.1.2.2                                                                        |
| 136 | CBP.B4.SUP.SF.1.2.4   | Dismantling of formwork for 2nd floor                      | Concrete       | 2          | 352.00            | 35.20               | CBP.B4.SUP.SF.1.2.3, CBP.B4.SUP.SF.1.1.4                                                   |
| 137 | CBP.B4.SUP.SF.1.1.1   | Erection of columns formwork for 2nd floor                 | Concrete       | 2          | 75480.00          | 7548.00             | CBP.B4.SUP.FF.1.2.3                                                                        |
| 138 | CBP.B4.SUP.SF.1.1.2   | Installation of columns reinforcement 2nd floor            | Concrete       | 1          | 32340.00          | 3234.00             | CBP.B4.SUP.SF.1.1.1                                                                        |
| 139 | CBP.B4.SUP.SF.1.1.3   | Pouring Concrete for 2nd floor                             | Concrete       | 1          | 26800.00          | 2680.00             | CBP.B4.SUP.SF.1.1.2                                                                        |
| 140 | CBP.B4.SUP.SF.1.1.4   | Dismantling of formwork for 2nd floor                      | Concrete       | 1          | 176.00            | 17.60               | CBP.B4.SUP.SF.1.1.3                                                                        |
| 141 | CBP.B4.SUP.SF.2.1.1   | Installation of concrete blocks 2nd floor                  | Masonry        | 5          | 11678.40          | 1167.84             | CBP.B4.SUP.SF.1.2.4, CBP.B4.SUP.FF.2.1.1                                                   |
| 142 | CBP.B4.SUP.SF.2.2.1.1 | Plastering walls of 2nd floor                              | Int Finishes   | 2          | 5382.40           | 538.24              | CBP.B4.SUP.SF.2.2.2.3                                                                      |
| 143 | CBP.B4.SUP.SF.2.2.1.2 | Painting walls of 2nd floor                                | Int Finishes   | 2          | 10200.00          | 1020.00             | CBP.B4.SUP.SF.2.2.1.1, CBP.B4.SUP.FF.2.2.1.2                                               |
| 144 | CBP.B4.SUP.SF.2.2.1.3 | Ceramic cladding of baths for 2nd floor                    | Int Finishes   | 2          | 10560.00          | 1056.00             | CBP.B4.SUP.SF.2.2.1.2                                                                      |
| 145 | CBP.B4.SUP.SF.2.2.1.4 | Marble cladding of lift lobby for 2nd floor                | Int Finishes   | 2          | 51680.00          | 5168.00             | CBP.B4.SUP.SF.2.2.1.2, CBP.B4.SUP.SF.2.2.1.3                                               |
| 146 | CBP.B4.SUP.SF.2.2.4.1 | Installation of handrail for 2nd floor                     | Int Finishes   | 1          | 4068.57           | 406.86              | CBP.B4.SUP.SF.2.2.4.2, CBP.B4.SUP.FF.2.2.4.1, CBP.B4.SUP.SF.2.2.3.1, CBP.B4.SUP.SF.2.2.3.2 |
| 147 | CBP.B4.SUP.SF.2.2.4.2 | Granite flooring for stairs 2nd floor                      | Int Finishes   | 1          | 45270.00          | 4527.00             | CBP.B4.SUP.SF.2.2.3.1                                                                      |
| 148 | CBP.B4.SUP.SF.2.2.2.1 | Plastering ceiling of 2nd floor                            | Int Finishes   | 2          | 4121.60           | 412.16              | CBP.B4.SUP.SF.2.1.1, CBP.B4.SUP.FF.2.2.1.1, CBP.B4.SUP.SF.3.1, CBP.B4.SUP.TF.3.1           |
| 149 | CBP.B4.SUP.SF.2.2.2.2 | Gypsum suspended ceiling 1st fix for 2nd floor             | Int Finishes   | 1          | 6552.00           | 655.20              | CBP.B4.SUP.SF.2.2.2.1, CBP.B4.SUP.FF.2.2.2.3, CBP.B4.SUP.SF.3.2, CBP.B4.SUP.TF.3.2         |
| 150 | CBP.B4.SUP.SF.2.2.2.3 | Gypsum suspended ceiling 2nd fix for 2nd floor             | Int Finishes   | 1          | 0.00              | 0.00                | CBP.B4.SUP.SF.2.2.2.2                                                                      |
| 151 | CBP.B4.SUP.SF.2.2.3.1 | Marble installation for lift lobby and corridors 2nd floor | Int Finishes   | 2          | 19680.00          | 1968.00             | CBP.B4.SUP.SF.2.2.1.4                                                                      |
| 152 | CBP.B4.SUP.SF.2.2.3.2 | Ceramic installation for baths 2nd floor                   | Int Finishes   | 1          | 2720.00           | 272.00              | CBP.B4.SUP.SF.2.2.3.1                                                                      |
| 153 | CBP.B4.SUP.TF.1.2.1   | Erection of slabs and beams formwork for 3rd floor         | Concrete       | 5          | 282920.00         | 28292.00            | CBP.B4.SUP.TF.1.1.3                                                                        |
| 154 | CBP.B4.SUP.TF.1.2.2   | Installation of reinforcement 3rd floor                    | Concrete       | 5          | 160116.00         | 16011.60            | CBP.B4.SUP.TF.1.2.1                                                                        |
| 155 | CBP.B4.SUP.TF.1.2.3   | Pouring concrete for 3rd floor                             | Concrete       | 1          | 129840.00         | 12984.00            | CBP.B4.SUP.TF.1.2.2                                                                        |
| 156 | CBP.B4.SUP.TF.1.2.4   | Dismantling of formwork for 3rd floor                      | Concrete       | 2          | 352.00            | 35.20               | CBP.B4.SUP.TF.1.2.3, CBP.B4.SUP.TF.1.1.4                                                   |
| 157 | CBP.B4.SUP.TF.1.1.1   | Erection of columns formwork for 3rd floor                 | Concrete       | 2          | 75480.00          | 7548.00             | CBP.B4.SUP.SF.1.2.3                                                                        |
| 158 | CBP.B4.SUP.TF.1.1.2   | Installation of columns reinforcement 3rd floor            | Concrete       | 1          | 32340.00          | 3234.00             | CBP.B4.SUP.TF.1.1.1                                                                        |
| 159 | CBP.B4.SUP.TF.1.1.3   | Pouring concrete for 3rd floor                             | Concrete       | 1          | 26800.00          | 2680.00             | CBP.B4.SUP.TF.1.1.2                                                                        |
| 160 | CBP.B4.SUP.TF.1.1.4   | Dismantling of formwork for 3rd floor                      | Concrete       | 1          | 176.00            | 17.60               | CBP.B4.SUP.TF.1.1.3                                                                        |
| 161 | CBP.B4.SUP.TF.2.1.1   | Installation of concrete blocks 3rd floor                  | Masonry        | 5          | 11678.40          | 1167.84             | CBP.B4.SUP.TF.1.2.4, CBP.B4.SUP.SF.2.1.1                                                   |
| 162 | CBP.B4.SUP.TF.2.2.1.1 | Plastering walls of 3rd floor                              | Int Finishes   | 2          | 5382.40           | 538.24              | CBP.B4.SUP.TF.2.2.2.3                                                                      |
| 163 | CBP.B4.SUP.TF.2.2.1.2 | Painting walls of 3rd floor                                | Int Finishes   | 2          | 10200.00          | 1020.00             | CBP.B4.SUP.TF.2.2.1.1, CBP.B4.SUP.SF.2.2.1.2                                               |
| 164 | CBP.B4.SUP.TF.2.2.1.3 | Ceramic cladding of baths for 3rd floor                    | Int Finishes   | 2          | 10560.00          | 1056.00             | CBP.B4.SUP.TF.2.2.1.2                                                                      |
| 165 | CBP.B4.SUP.TF.2.2.1.4 | Marble cladding of lift lobby for 3rd floor                | Int Finishes   | 2          | 51680.00          | 5168.00             | CBP.B4.SUP.TF.2.2.1.2, CBP.B4.SUP.TF.2.2.1.3                                               |
| 166 | CBP.B4.SUP.TF.2.2.4.1 | Installation of handrail for 3rd floor                     | Int Finishes   | 1          | 4160.00           | 416.00              | CBP.B4.SUP.TF.2.2.4.2, CBP.B4.SUP.SF.2.2.4.1, CBP.B4.SUP.TF.2.2.3.1, CBP.B4.SUP.TF.2.2.3.2 |
| 167 | CBP.B4.SUP.TF.2.2.4.2 | Granite flooring for stairs 3rd floor                      | Int Finishes   | 1          | 45270.00          | 4527.00             | CBP.B4.SUP.TF.2.2.3.1                                                                      |
| 168 | CBP.B4.SUP.TF.2.2.2.1 | Plastering ceiling of 3rd floor                            | Int Finishes   | 2          | 4121.60           | 412.16              | CBP.B4.SUP.TF.2.1.1, CBP.B4.SUP.SF.2.2.1.1                                                 |
| 169 | CBP.B4.SUP.TF.2.2.2.2 | Gypsum suspended ceiling 1st fix for 3rd floor             | Int Finishes   | 1          | 6552.00           | 655.20              | CBP.B4.SUP.TF.2.2.2.1, CBP.B4.SUP.SF.2.2.2.3                                               |

Table S1: Scheduling and cost details of building B4 of the CBP case study project (cont.)

| No. | WBS Code               | Work Item Description                                      | Sub-contractor | Dur (days) | Direct Costs (\$) | Indirect Costs (\$) | Predecessors                                                                                   |
|-----|------------------------|------------------------------------------------------------|----------------|------------|-------------------|---------------------|------------------------------------------------------------------------------------------------|
| 170 | CBP.B4.SUP.TF.2.2.2.3  | Gypsum suspended ceiling 2nd fix for 3rd floor             | Int Finishes   | 1          | 0.00              | 0.00                | CBP.B4.SUP.TF.2.2.2.2                                                                          |
| 171 | CBP.B4.SUP.TF.2.2.3.1  | Marble installation for lift lobby and corridors 3rd floor | Int Finishes   | 2          | 19680.00          | 1968.00             | CBP.B4.SUP.TF.2.2.1.4                                                                          |
| 172 | CBP.B4.SUP.TF.2.2.3.2  | Ceramic installation for baths 3rd floor                   | Int Finishes   | 1          | 2720.00           | 272.00              | CBP.B4.SUP.TF.2.2.3.1                                                                          |
| 173 | CBP.B4.SUP.FRF.1.2.1   | Erection of slabs and beams formwork for 4th floor         | Concrete       | 5          | 282920.00         | 28292.00            | CBP.B4.SUP.FRF.1.1.3                                                                           |
| 174 | CBP.B4.SUP.FRF.1.2.2   | Installation of reinforcement 4th floor                    | Concrete       | 5          | 160116.00         | 16011.60            | CBP.B4.SUP.FRF.1.2.1                                                                           |
| 175 | CBP.B4.SUP.FRF.1.2.3   | Pouring concrete for 4th floor                             | Concrete       | 1          | 129840.00         | 12984.00            | CBP.B4.SUP.FRF.1.2.2                                                                           |
| 176 | CBP.B4.SUP.FRF.1.2.4   | Dismantling of formwork for 4th floor                      | Concrete       | 2          | 352.00            | 35.20               | CBP.B4.SUP.FRF.1.2.3, CBP.B4.SUP.FRF.1.1.4                                                     |
| 177 | CBP.B4.SUP.FRF.1.1.1   | Erection of columns formwork for 4th floor                 | Concrete       | 2          | 75480.00          | 7548.00             | CBP.B4.SUP.TF.1.2.3                                                                            |
| 178 | CBP.B4.SUP.FRF.1.1.2   | Installation of columns reinforcement 4th floor            | Concrete       | 1          | 32340.00          | 3234.00             | CBP.B4.SUP.FRF.1.1.1                                                                           |
| 179 | CBP.B4.SUP.FRF.1.1.3   | Pouring concrete for 4th floor                             | Concrete       | 1          | 26800.00          | 2680.00             | CBP.B4.SUP.FRF.1.1.2                                                                           |
| 180 | CBP.B4.SUP.FRF.1.1.4   | Dismantling of formwork for 4th floor                      | Concrete       | 1          | 176.00            | 17.60               | CBP.B4.SUP.FRF.1.1.3                                                                           |
| 181 | CBP.B4.SUP.FRF.2.1.1   | Installation of concrete blocks 4th floor                  | Masonry        | 5          | 11678.40          | 1167.84             | CBP.B4.SUP.FRF.1.2.4, CBP.B4.SUP.TF.2.1.1                                                      |
| 182 | CBP.B4.SUP.FRF.2.2.1.1 | Plastering walls of 4th floor                              | Int Finishes   | 2          | 5382.40           | 538.24              | CBP.B4.SUP.FRF.2.2.2.3                                                                         |
| 183 | CBP.B4.SUP.FRF.2.2.1.2 | Painting walls of 4th floor                                | Int Finishes   | 2          | 10200.00          | 1020.00             | CBP.B4.SUP.FRF.2.2.1.1, CBP.B4.SUP.TF.2.2.1.2                                                  |
| 184 | CBP.B4.SUP.FRF.2.2.1.3 | Ceramic cladding of baths for 4th floor                    | Int Finishes   | 2          | 10560.00          | 1056.00             | CBP.B4.SUP.FRF.2.2.1.2                                                                         |
| 185 | CBP.B4.SUP.FRF.2.2.1.4 | Marble cladding of lift lobby for 4th floor                | Int Finishes   | 2          | 51680.00          | 5168.00             | CBP.B4.SUP.FRF.2.2.1.2, CBP.B4.SUP.FRF.2.2.1.3                                                 |
| 186 | CBP.B4.SUP.FRF.2.2.4.1 | Installation of handrail for 4th floor                     | Int Finishes   | 1          | 4160.00           | 416.00              | CBP.B4.SUP.FRF.2.2.4.2, CBP.B4.SUP.TF.2.2.4.1, CBP.B4.SUP.FRF.2.2.3.1, CBP.B4.SUP.FRF.2.2.3.2  |
| 187 | CBP.B4.SUP.FRF.2.2.4.2 | Granite flooring for stairs 4th floor                      | Int Finishes   | 1          | 45270.00          | 4527.00             | CBP.B4.SUP.FRF.2.2.3.1                                                                         |
| 188 | CBP.B4.SUP.FRF.2.2.2.1 | Plastering ceiling of 4th floor                            | Int Finishes   | 2          | 4121.60           | 412.16              | CBP.B4.SUP.FRF.2.1.1, CBP.B4.SUP.TF.2.2.1.1, CBP.B4.SUP.FRF.3.1                                |
| 189 | CBP.B4.SUP.FRF.2.2.2.2 | Gypsum suspended ceiling 1st fix for 4th floor             | Int Finishes   | 1          | 6552.00           | 655.20              | CBP.B4.SUP.FRF.2.2.2.1, CBP.B4.SUP.TF.2.2.2.3                                                  |
| 190 | CBP.B4.SUP.FRF.2.2.2.3 | Gypsum suspended ceiling 2nd fix for 4th floor             | Int Finishes   | 1          | 0.00              | 0.00                | CBP.B4.SUP.FRF.2.2.2.2                                                                         |
| 191 | CBP.B4.SUP.FRF.2.2.3.1 | Marble installation for lift lobby and corridors 4th floor | Int Finishes   | 2          | 19680.00          | 1968.00             | CBP.B4.SUP.FRF.2.2.1.4                                                                         |
| 192 | CBP.B4.SUP.FRF.2.2.3.2 | Ceramic installation for baths 4th floor                   | Int Finishes   | 1          | 2720.00           | 272.00              | CBP.B4.SUP.FRF.2.2.3.1                                                                         |
| 193 | CBP.B4.SUP.FVF.1.2.1   | Erection of slabs and beams formwork for 5th floor         | Concrete       | 5          | 282920.00         | 28292.00            | CBP.B4.SUP.FVF.1.1.3                                                                           |
| 194 | CBP.B4.SUP.FVF.1.2.2   | Installation of reinforcement 5th floor                    | Concrete       | 5          | 160116.00         | 16011.60            | CBP.B4.SUP.FVF.1.2.1                                                                           |
| 195 | CBP.B4.SUP.FVF.1.2.3   | Pouring concrete for 5th floor                             | Concrete       | 1          | 129840.00         | 12984.00            | CBP.B4.SUP.FVF.1.2.2                                                                           |
| 196 | CBP.B4.SUP.FVF.1.2.4   | Dismantling of formwork for 5th floor                      | Concrete       | 2          | 352.00            | 35.20               | CBP.B4.SUP.FVF.1.2.3, CBP.B4.SUP.FVF.1.1.4                                                     |
| 197 | CBP.B4.SUP.FVF.1.1.1   | Erection of columns formwork for 5th floor                 | Concrete       | 2          | 75480.00          | 7548.00             | CBP.B4.SUP.FRF.1.2.3                                                                           |
| 198 | CBP.B4.SUP.FVF.1.1.2   | Installation of columns reinforcement 5th floor            | Concrete       | 1          | 32340.00          | 3234.00             | CBP.B4.SUP.FVF.1.1.1                                                                           |
| 199 | CBP.B4.SUP.FVF.1.1.3   | Pouring concrete for 5th floor                             | Concrete       | 1          | 26800.00          | 2680.00             | CBP.B4.SUP.FVF.1.1.2                                                                           |
| 200 | CBP.B4.SUP.FVF.1.1.4   | Dismantling of formwork for 5th floor                      | Concrete       | 1          | 176.00            | 17.60               | CBP.B4.SUP.FVF.1.1.3                                                                           |
| 201 | CBP.B4.SUP.FVF.2.1.1   | Installation of concrete blocks 5th floor                  | Masonry        | 5          | 11678.40          | 1167.84             | CBP.B4.SUP.FVF.1.2.4, CBP.B4.SUP.FRF.2.1.1                                                     |
| 202 | CBP.B4.SUP.FVF.2.2.1.1 | Plastering walls of 5th floor                              | Int Finishes   | 2          | 5382.40           | 538.24              | CBP.B4.SUP.FVF.2.2.2.3                                                                         |
| 203 | CBP.B4.SUP.FVF.2.2.1.2 | Painting walls of 5th floor                                | Int Finishes   | 2          | 10200.00          | 1020.00             | CBP.B4.SUP.FVF.2.2.1.1, CBP.B4.SUP.FRF.2.2.1.2                                                 |
| 204 | CBP.B4.SUP.FVF.2.2.1.3 | Ceramic cladding of baths for 5th floor                    | Int Finishes   | 2          | 10560.00          | 1056.00             | CBP.B4.SUP.FVF.2.2.1.2                                                                         |
| 205 | CBP.B4.SUP.FVF.2.2.1.4 | Marble cladding of lift lobby for 5th floor                | Int Finishes   | 2          | 51680.00          | 5168.00             | CBP.B4.SUP.FVF.2.2.1.2, CBP.B4.SUP.FVF.2.2.1.3                                                 |
| 206 | CBP.B4.SUP.FVF.2.2.4.1 | Installation of handrail for 5th floor                     | Int Finishes   | 1          | 4160.00           | 416.00              | CBP.B4.SUP.FVF.2.2.4.2, CBP.B4.SUP.FRF.2.2.4.1, CBP.B4.SUP.FVF.2.2.3.1, CBP.B4.SUP.FVF.2.2.3.2 |
| 207 | CBP.B4.SUP.FVF.2.2.4.2 | Granite flooring for stairs 5th floor                      | Int Finishes   | 1          | 45270.00          | 4527.00             | CBP.B4.SUP.FVF.2.2.3.1                                                                         |

Table S1: Scheduling and cost details of building B4 of the CBP case study project (cont.)

| No. | WBS Code               | Work Item Description                                           | Sub-contractor | Dur (days) | Direct Costs (\$) | Indirect Costs (\$) | Predecessors                                                                           |
|-----|------------------------|-----------------------------------------------------------------|----------------|------------|-------------------|---------------------|----------------------------------------------------------------------------------------|
| 208 | CBP.B4.SUP.FVF.2.2.2.1 | Plastering ceiling of 5th floor                                 | Int Finishes   | 2          | 4121.60           | 412.16              | CBP.B4.SUP.FVF.2.1.1, CBP.B4.SUP.FRF.2.2.1.1, CBP.B4.SUP.FVF.3.1                       |
| 209 | CBP.B4.SUP.FVF.2.2.2.2 | Gypsum suspended ceiling 1st fix for 5th floor                  | Int Finishes   | 1          | 6552.00           | 655.20              | CBP.B4.SUP.FVF.2.2.2.1, CBP.B4.SUP.FRF.2.2.2.3, CBP.B4.SUP.FRF.3.2, CBP.B4.SUP.FVF.3.2 |
| 210 | CBP.B4.SUP.FVF.2.2.2.3 | Gypsum suspended ceiling 2nd fix for 5th floor                  | Int Finishes   | 1          | 0.00              | 0.00                | CBP.B4.SUP.FVF.2.2.2.2                                                                 |
| 211 | CBP.B4.SUP.FVF.2.2.3.1 | Marble installation for lift lobby and corridors 5th floor      | Int Finishes   | 2          | 19680.00          | 1968.00             | CBP.B4.SUP.FVF.2.2.1.4                                                                 |
| 212 | CBP.B4.SUP.FVF.2.2.3.2 | Ceramic installation for baths 5th floor                        | Int Finishes   | 1          | 2720.00           | 272.00              | CBP.B4.SUP.FVF.2.2.3.1                                                                 |
| 213 | CBP.B4.SUP.LGF.2.2.2.3 | Gypsum suspended ceiling 2nd fix for lower ground floor         | Int Finishes   | 1          | 0.00              | 0.00                | CBP.B4.SUP.LGF.2.2.2.2                                                                 |
| 214 | CBP.B4.SUP.GF.2.2.2.3  | Gypsum suspended ceiling 2nd fix for ground floor               | Int Finishes   | 1          | 0.00              | 0.00                | CBP.B4.SUP.GF.2.2.2.2                                                                  |
| 215 | CBP.B4.SUP.FF.2.2.2.3  | Gypsum suspended ceiling 2nd fix for 1st floor                  | Int Finishes   | 1          | 0.00              | 0.00                | CBP.B4.SUP.FF.2.2.2.2                                                                  |
| 216 | CBP.B4.SUP.EXT.1       | Installation of Aluminium / Glass / Mullions sheets             | Ext Finishes   | 4          | 2080000.00        | 208000.00           | CBP.B4.SUP.SXF.2.1.1                                                                   |
| 217 | CBP.B4.SUP.EXT.2       | Installation of Steel shades                                    | Ext Finishes   | 1          | 1680.00           | 168.00              | CBP.B4.SUP.EXT.1                                                                       |
| 218 | CBP.B4.SUP.LGF.3.1     | Rough work for lower ground floor                               | MEP            | 5          | 1029604.00        | 102960.40           | CBP.B4.SUP.LGF.1.2.2, CBP.B4.SUB.2.3.1                                                 |
| 219 | CBP.B4.SUP.LGF.3.2     | Installation of accessories and fixtures for lower ground floor | MEP            | 5          | 450452.00         | 45045.20            | CBP.B4.SUP.LGF.3.1, CBP.B4.SUB.2.3.2                                                   |
| 220 | CBP.B4.SUP.GF.3.1      | Rough work for ground floor                                     | MEP            | 5          | 1029604.00        | 102960.40           | CBP.B4.SUP.GF.1.2.2, CBP.B4.SUP.LGF.3.1                                                |
| 221 | CBP.B4.SUP.GF.3.2      | Installation of accessories and fixtures for lower ground floor | MEP            | 5          | 450452.00         | 45045.20            | CBP.B4.SUP.GF.3.1, CBP.B4.SUP.LGF.3.2                                                  |
| 222 | CBP.B4.SUP.FF.3.1      | Rough work for 1st floor                                        | MEP            | 5          | 1029604.00        | 102960.40           | CBP.B4.SUP.FF.1.2.2, CBP.B4.SUP.GF.3.1                                                 |
| 223 | CBP.B4.SUP.FF.3.2      | Installation of accessories and fixtures for 1st floor          | MEP            | 5          | 450452.00         | 45045.20            | CBP.B4.SUP.FF.3.1, CBP.B4.SUP.GF.3.2                                                   |
| 224 | CBP.B4.SUP.SF.3.1      | Rough work for 2nd floor                                        | MEP            | 5          | 1029604.00        | 102960.40           | CBP.B4.SUP.SF.1.2.2, CBP.B4.SUP.FF.3.1                                                 |
| 225 | CBP.B4.SUP.SF.3.2      | Installation of accessories and fixtures for 2nd floor          | MEP            | 5          | 450452.00         | 45045.20            | CBP.B4.SUP.SF.3.1, CBP.B4.SUP.FF.3.2                                                   |
| 226 | CBP.B4.SUP.TF.3.1      | Rough work for 3rd floor                                        | MEP            | 5          | 1029604.00        | 102960.40           | CBP.B4.SUP.TF.1.2.2, CBP.B4.SUP.SF.3.1                                                 |
| 227 | CBP.B4.SUP.TF.3.2      | Installation of accessories and fixtures for 3rd floor          | MEP            | 5          | 450452.00         | 45045.20            | CBP.B4.SUP.TF.3.1, CBP.B4.SUP.SF.3.2                                                   |
| 228 | CBP.B4.SUP.FRF.3.1     | Rough work for 4th floor                                        | MEP            | 5          | 1029604.00        | 102960.40           | CBP.B4.SUP.FRF.1.2.2, CBP.B4.SUP.TF.3.1                                                |
| 229 | CBP.B4.SUP.FRF.3.2     | Installation of accessories and fixtures for 4th floor          | MEP            | 5          | 450452.00         | 45045.20            | CBP.B4.SUP.FRF.3.1, CBP.B4.SUP.TF.3.2                                                  |
| 230 | CBP.B4.SUP.FVF.3.1     | Rough work for 5th floor                                        | MEP            | 5          | 1029604.00        | 102960.40           | CBP.B4.SUP.FVF.1.2.2, CBP.B4.SUP.FRF.3.1                                               |
| 231 | CBP.B4.SUP.FVF.3.2     | Installation of accessories and fixtures for 5th floor          | MEP            | 5          | 450452.00         | 45045.20            | CBP.B4.SUP.FVF.3.1, CBP.B4.SUP.FRF.3.2                                                 |
| 232 | CBP.B4.SUP.SXF.3.1     | Rough work for 6th floor                                        | MEP            | 5          | 1029604.00        | 102960.40           | CBP.B4.SUP.SXF.1.2.2, CBP.B4.SUP.FVF.3.1                                               |
| 233 | CBP.B4.SUP.SXF.3.2     | Installation of equipment for 6th floor                         | MEP            | 5          | 5791520.00        | 579152.00           | CBP.B4.SUP.SXF.1.2.4                                                                   |
| 234 | CBP.B4.SUP.SXF.3.3     | Installation of accessories and fixtures for 6th floor          | MEP            | 5          | 450452.00         | 45045.20            | CBP.B4.SUP.SXF.3.1, CBP.B4.SUP.SXF.3.2, CBP.B4.SUP.FVF.3.2                             |
| 235 | CBP.B4.SUB.1.3.1       | Rough work for 1st level basement                               | MEP            | 5          | 1029604.00        | 102960.40           | CBP.B4.SUB.1.1.2.2                                                                     |
| 236 | CBP.B4.SUB.1.3.2       | Installation of accessories and fixtures for 1st level basement | MEP            | 5          | 450452.00         | 45045.20            | CBP.B4.SUB.1.3.1                                                                       |
| 237 | CBP.B4.SUB.2.3.1       | Rough work for 2nd level basement                               | MEP            | 5          | 1029604.00        | 102960.40           | CBP.B4.SUB.2.1.2.2, CBP.B4.SUB.1.3.1                                                   |
| 238 | CBP.B4.SUB.2.3.2       | Installation of accessories and fixtures for 2nd level basement | MEP            | 5          | 450452.00         | 45045.20            | CBP.B4.SUB.2.3.1, CBP.B4.SUB.1.3.2                                                     |
